# Supplementary material for: Multidimensional evaluation of performance: experimental application of the balanced scorecard in Ferrara university hospital
Source: PubMed Central journal article supplement (PMC2759901; doi:10.1186/1478-7547-7-15), 2009-09-08

**COMMUNITY PERSPECTIVE**

**USER**

Satisfy the healthcare needs of the reference population      Increase user trust

**OWNER**

Ensure an equal, appropriate and sustainable service in collaboration with the region

**PUBLIC ENTITY**

Safeguard the working environment, ensuring the best hygiene and organisational conditions

**INTERNAL PROCEDURE PERSPECTIVE**

Improve response capacity

Increase attractiveness for extra-provincial population

Improve appropriateness of performance

Risk Management

Accreditation

Improve user knowledge of services and products provided

Improve inter-personal aspects of rapport with user

Rationalise and innovate the structure of the products and services provided

Maintain excellent hygiene and organisational standards

**FINANCIAL RESOURCE PERSPECTIVE**

Ensure financial sustainability

**GROWTH AND LEARNING PERSPECTIVE**

**HUMAN ASSETS**

Continual updating      Improve interpersonal skills

**INFORMATION ASSETS**

Improve the capacity to update and utilise information flow

**ORGANISATIONAL ASSETS**

Initiate and evaluate organisational wellbeing      Improve inter- and intra-departmental cooperation

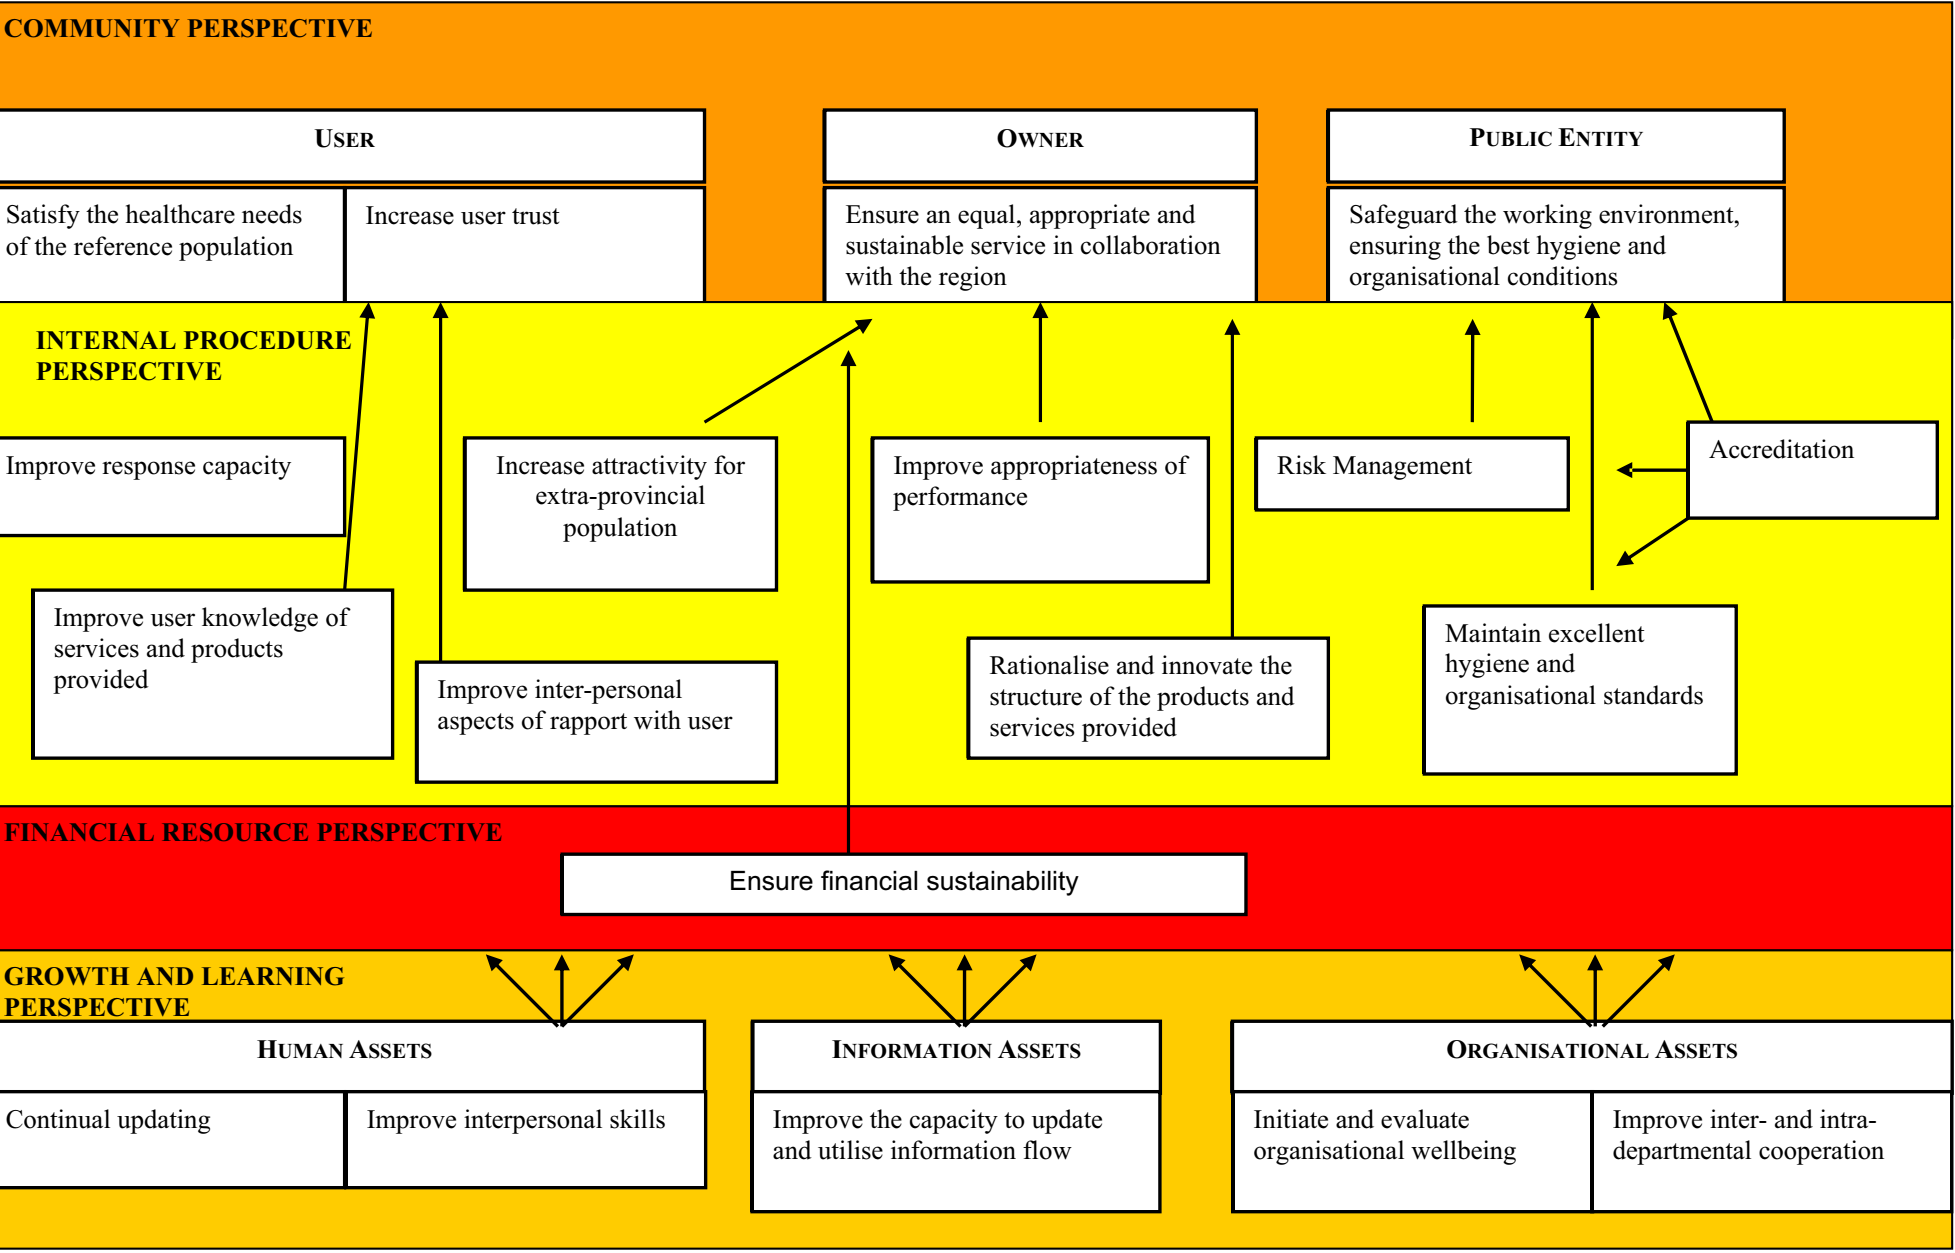

Supplement: 1478-7547-7-15-S1.pdf [file 1478-7547-7-15-S1.pdf]
