# Supplementary material for: Multidimensional evaluation of performance: experimental application of the balanced scorecard in Ferrara university hospital
Source: PubMed Central journal article supplement (PMC2759901; doi:10.1186/1478-7547-7-15), 2009-09-08

**COMMUNITY PERSPECTIVE**

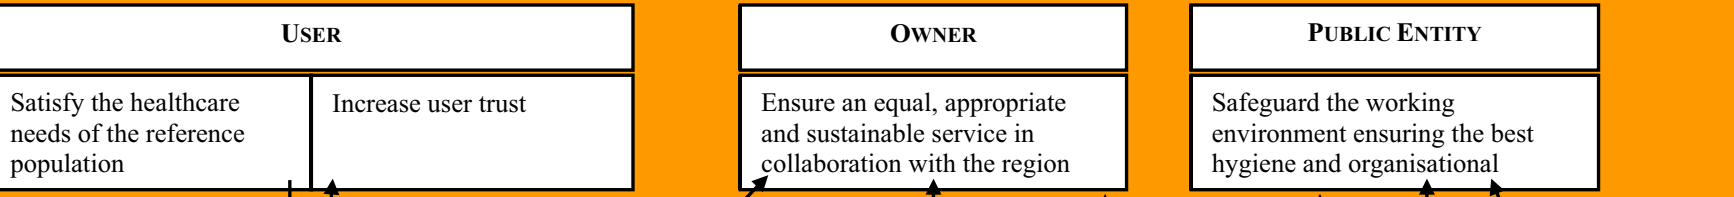

**INTERNAL PROCEDURE PERSPECTIVE**

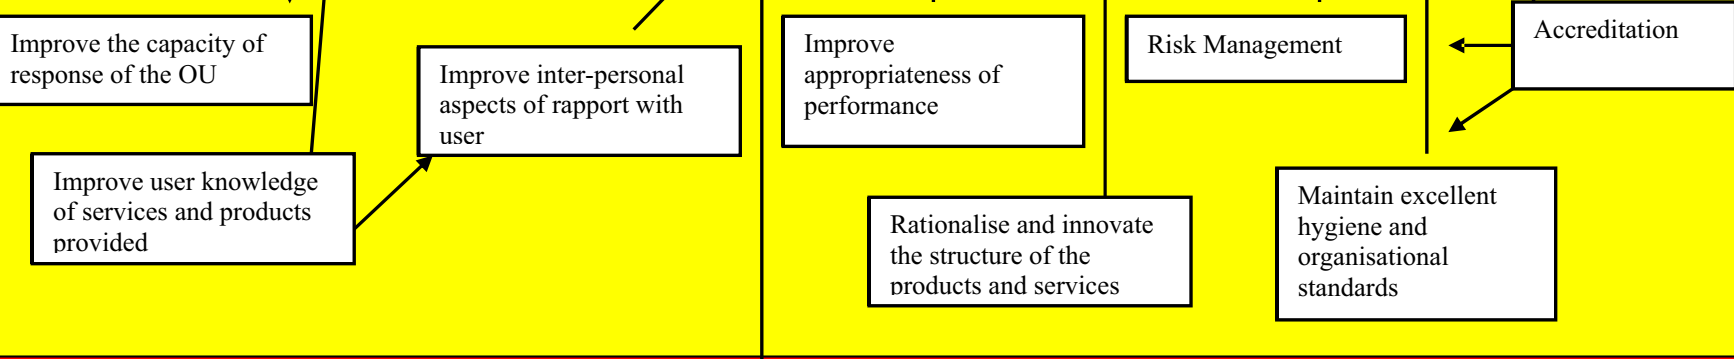

**FINANCIAL RESOURCE PERSPECTIVE**

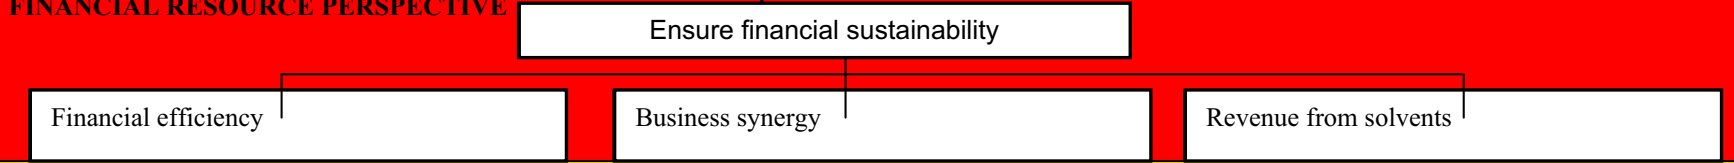

**GROWTH AND LEARNING PERSPECTIVE**

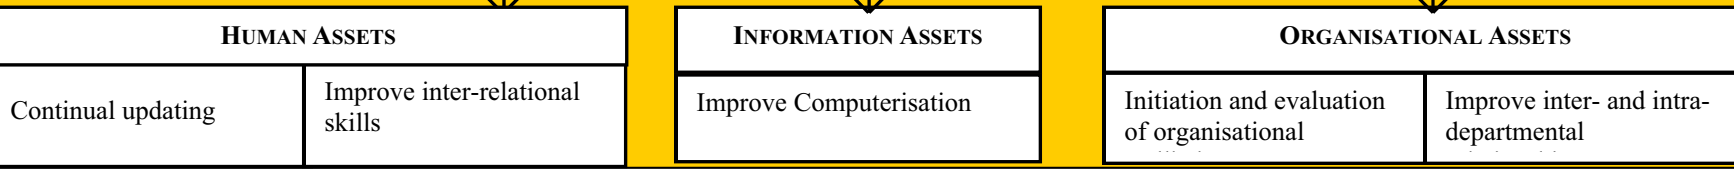

Supplement: 1478-7547-7-15-S6.pdf [file 1478-7547-7-15-S6.pdf]
