# Supplementary material for: Multidimensional evaluation of performance: experimental application of the balanced scorecard in Ferrara university hospital
Source: PubMed Central journal article supplement (PMC2759901; doi:10.1186/1478-7547-7-15), 2009-09-08
Supplement: 1478-7547-7-15-S11.pdf [file 1478-7547-7-15-S11.pdf]

| Perspective         | Pictorial representation                                                             |
|---------------------|--------------------------------------------------------------------------------------|
| COMMUNITY           | 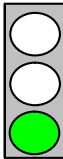   |
| INTERNAL PROCEDURE  |   |
| FINANCIAL RESOURCE  |   |
| GROWTH AND LEARNING |  |
