# Supplementary material for: Multidimensional evaluation of performance: experimental application of the balanced scorecard in Ferrara university hospital
Source: Springer Nature journal article supplement (doi:10.1186/1478-7547-7-15), 2009-01-01

**Perspective****Pictorial representation**

COMMUNITY

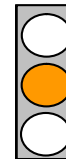

INTERNAL PROCEDURE

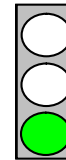

FINANCIAL RESOURCE

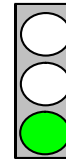

GROWTH AND LEARNING

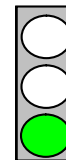

Supplement: Additional file 12 [file 1478-7547-7-15-s12.pdf]
